# Supplementary material
Source: Springer Nature journal article supplement (https://mijn.bsl.nl/resource/supplementary/13047_2013_574_MOESM4_ESM.pdf/7112490)

Tibial transverse plane motion (°)

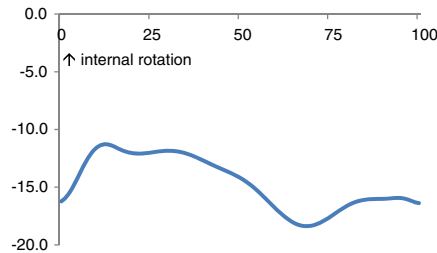

Rearfoot transverse plane motion relative to tibia (°)

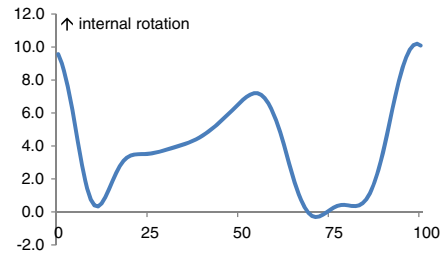

Forefoot transverse plane motion (°)

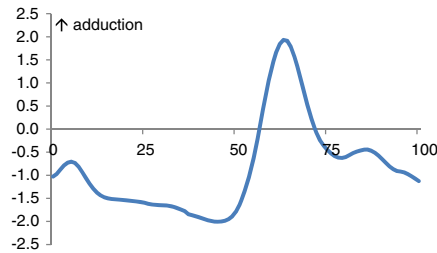

Rearfoot transverse plane motion relative to laboratory (°)

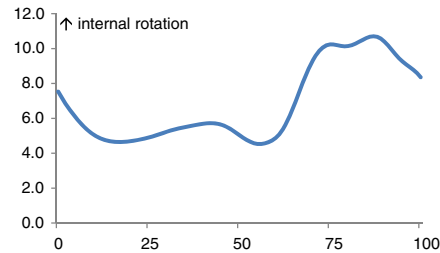

Supplement: MOESM4 [file 7112490]
